# Supplementary material for: Cell of Origin Influences Pancreatic Cancer Subtype
Source: Oxford University Press journal article supplement (doi:10.1158/2159-8290.cd-20-0633), 2021-03-01
Supplement: 21598290cd200633-sup-242980_2_supp_6839449_qmy5kp.xlsx [file 21598290cd200633-sup-242980_2_supp_6839449_qmy5kp.xlsx]

## Sheet: Table S2
Table S2: Phenotypes in acinar cell-of-origin Trp53 missense mutation mouse cohorts
Mouse ID	Days post-tamoxifen	Sex	Genotype	Pancreatic cancer symptoms	Pancreas endpoint classification	Tumor-Adjacent PanINs	Primary Tumor Grade	Secondary Tumor Grade	Liver metastasis
BF1844	147	F	KT;Ptf1aCreER;Trp53fl/-	Hemorrhagic Ascites	Adenocarcinoma	Yes	Moderately/Well-Differentiated	-	No
BF1911	97	F	KT;Ptf1aCreER;Trp53fl/-	None Observed	Adenocarcinoma	Yes	Moderately/Well-Differentiated	-	No
BF1918	134	F	KT;Ptf1aCreER;Trp53fl/-	Bowel Obstruction	Adenocarcinoma	Yes	Moderately/Well-Differentiated	Poorly-Differentiated	No
BF1945	106	F	KT;Ptf1aCreER;Trp53fl/-	Hemorrhagic Ascites & Jaundice	Adenocarcinoma	Yes	Poorly-Differentiated	-	Yes
BF1975	140	F	KT;Ptf1aCreER;Trp53fl/-	None Observed	Adenocarcinoma	Yes	Moderately/Well-Differentiated	Poorly-Differentiated	No
BF2111	150	F	KT;Ptf1aCreER;Trp53fl/-	Hemorrhagic Ascites	Adenocarcinoma	Yes	Moderately/Well-Differentiated	Poorly-Differentiated	Yes
BF2148	127	F	KT;Ptf1aCreER;Trp53fl/-	Hemorrhagic Ascites, Jaundice, & Bowel Obstruction	Adenocarcinoma	Yes	Moderately/Well-Differentiated	Poorly-Differentiated	No
BF2250	107	F	KT;Ptf1aCreER;Trp53fl/-	None Observed	Adenocarcinoma	Yes	Moderately/Well-Differentiated	Poorly-Differentiated	No
BF2281	141	F	KT;Ptf1aCreER;Trp53fl/-	None Observed	Adenocarcinoma	Yes	Poorly-Differentiated	Moderately/Well-Differentiated	No
BF2310	99	F	KT;Ptf1aCreER;Trp53fl/-	Hemorrhagic Ascites & Bowel Obstruction	Adenocarcinoma	Yes	Moderately/Well-Differentiated	Poorly-Differentiated	No
BF2311	110	F	KT;Ptf1aCreER;Trp53fl/-	Bowel Obstruction	Adenocarcinoma	Yes	Poorly-Differentiated	-	No
BF1789	167	M	KT;Ptf1aCreER;Trp53fl/-	Hemorrhagic Ascites	Adenocarcinoma	Not determined due to poor tissue preservation	Poorly-Differentiated	-	No
BF1852	205	M	KT;Ptf1aCreER;Trp53fl/-	Hemorrhagic Ascites	Adenocarcinoma	Yes	Poorly-Differentiated	Moderately/Well-Differentiated	No
BF1903	106	M	KT;Ptf1aCreER;Trp53fl/-	None Observed	Adenocarcinoma	Yes	Moderately/Well-Differentiated	Poorly-Differentiated	No
BF1935	129	M	KT;Ptf1aCreER;Trp53fl/-	None Observed	Adenocarcinoma	Yes	Moderately/Well-Differentiated	-	No
BF2080	123	M	KT;Ptf1aCreER;Trp53fl/-	Hemorrhagic Ascites	Adenocarcinoma	Yes	Moderately/Well-Differentiated	-	No
BF2102	89	M	KT;Ptf1aCreER;Trp53fl/-	None Observed	Adenocarcinoma	Yes	Moderately/Well-Differentiated	-	-
BF2120	143	M	KT;Ptf1aCreER;Trp53fl/-	Hemorrhagic Ascites & Jaundice	Adenocarcinoma	Yes	Moderately/Well-Differentiated	Poorly-Differentiated	Yes
BF2132	154	M	KT;Ptf1aCreER;Trp53fl/-	Hemorrhagic Ascites & Bowel Obstruction	Adenocarcinoma	Yes	Moderately/Well-Differentiated	Poorly-Differentiated	Yes
BF2158	111	M	KT;Ptf1aCreER;Trp53fl/-	None Observed	Adenocarcinoma	Yes	Moderately/Well-Differentiated	Poorly-Differentiated	No
BF2160	111	M	KT;Ptf1aCreER;Trp53fl/-	Ascites & Bowel Obstruction	Adenocarcinoma	Yes	Moderately/Well-Differentiated	-	No
BF2201	112	M	KT;Ptf1aCreER;Trp53fl/-	Hemorrhagic Ascites	Adenocarcinoma	Yes	Moderately/Well-Differentiated	Poorly-Differentiated	No
BF2314	120	M	KT;Ptf1aCreER;Trp53fl/-	Hemorrhagic Ascites	Adenocarcinoma	Yes	Moderately/Well-Differentiated	Poorly-Differentiated	No
BF1206	137	F	KT;Ptf1aCreER;Trp53fl/LSL-R172H	Hemorrhagic Ascites & Bowel Obstruction	Adenocarcinoma	Yes	Moderately/Well-Differentiated	-	No
BF1691	128	F	KT;Ptf1aCreER;Trp53fl/LSL-R172H	Ascites & Jaundice	Adenocarcinoma	Yes	Poorly-Differentiated	Moderately/Well-Differentiated	No
BF1715	159	F	KT;Ptf1aCreER;Trp53fl/LSL-R172H	Bowel Obstruction	Adenocarcinoma	Yes	Poorly-Differentiated	Moderately/Well-Differentiated	No
BF1767	155	F	KT;Ptf1aCreER;Trp53fl/LSL-R172H	Hemorrhagic Ascites	Adenocarcinoma	Yes	Moderately/Well-Differentiated	Poorly-Differentiated	-
BF1965	138	F	KT;Ptf1aCreER;Trp53fl/LSL-R172H	Bowel obstruction	Adenocarcinoma	Yes	Poorly-Differentiated	-	Yes
BF2011	189	F	KT;Ptf1aCreER;Trp53fl/LSL-R172H	Hemorrhagic Ascites	Adenocarcinoma	Yes	Moderately/Well-Differentiated	-	No
BF2064	144	F	KT;Ptf1aCreER;Trp53fl/LSL-R172H	Bowel obstruction	Adenocarcinoma	Yes	Moderately/Well-Differentiated	-	No
BF2065	133	F	KT;Ptf1aCreER;Trp53fl/LSL-R172H	Jaundice & Bowel obstruction	Adenocarcinoma	Yes	Poorly-Differentiated	-	No
BF2138	134	F	KT;Ptf1aCreER;Trp53fl/LSL-R172H	Hemorrhagic Ascites	Adenocarcinoma	Yes	Poorly-Differentiated	-	No
BF1208	166	M	KT;Ptf1aCreER;Trp53fl/LSL-R172H	Jaundice	Adenocarcinoma	Yes	Moderately/Well-Differentiated	Poorly-Differentiated	Yes
BF1209	126	M	KT;Ptf1aCreER;Trp53fl/LSL-R172H	Hemorrhagic Ascites	Adenocarcinoma	Yes	Moderately/Well-Differentiated	Poorly-Differentiated	No
BF1693	137	M	KT;Ptf1aCreER;Trp53fl/LSL-R172H	Bowel Obstruction	Adenocarcinoma	Yes	Poorly-Differentiated	Moderately/Well-Differentiated	No
BF1720	170	M	KT;Ptf1aCreER;Trp53fl/LSL-R172H	None Observed	Adenocarcinoma	Yes	Moderately/Well-Differentiated	-	-
BF1783	177	M	KT;Ptf1aCreER;Trp53fl/LSL-R172H	None Observed	Adenocarcinoma	Yes	Poorly-Differentiated	Moderately/Well-Differentiated	No
BF1810	140	M	KT;Ptf1aCreER;Trp53fl/LSL-R172H	Hemorrhagic Ascites	Adenocarcinoma	No	Moderately/Well-Differentiated	-	No
BF1821	179	M	KT;Ptf1aCreER;Trp53fl/LSL-R172H	Jaundice	Adenocarcinoma	Yes	Moderately/Well-Differentiated	-	No
BF1824	183	M	KT;Ptf1aCreER;Trp53fl/LSL-R172H	Jaundice	Adenocarcinoma	Yes	Moderately/Well-Differentiated	Poorly-Differentiated	No
BF1828	193	M	KT;Ptf1aCreER;Trp53fl/LSL-R172H	Ascites & Bowel Obstruction	Adenocarcinoma	Yes	Moderately/Well-Differentiated	-	No
BF1836	177	M	KT;Ptf1aCreER;Trp53fl/LSL-R172H	None Observed	Adenocarcinoma	Yes	Moderately/Well-Differentiated	-	No
BF1851	212	M	KT;Ptf1aCreER;Trp53fl/LSL-R172H	Hemorrhagic Ascites	Adenocarcinoma	Yes	Moderately/Well-Differentiated	Poorly-Differentiated	Yes
BF1863	137	M	KT;Ptf1aCreER;Trp53fl/LSL-R172H	Hemorrhagic Ascites	Adenocarcinoma	Yes	Moderately/Well-Differentiated	Poorly-Differentiated	No
BF1880	141	M	KT;Ptf1aCreER;Trp53fl/LSL-R172H	Hemorrhagic Ascites	Adenocarcinoma	Yes	Moderately/Well-Differentiated	-	Yes
BF1913	140	M	KT;Ptf1aCreER;Trp53fl/LSL-R172H	Bowel Obstruction	Adenocarcinoma	Yes	Poorly-Differentiated	Moderately/Well-Differentiated	No
BF2014	109	M	KT;Ptf1aCreER;Trp53fl/LSL-R172H	Hemorrhagic Ascites & Bowl Obstruction	Adenocarcinoma	Yes	Moderately/Well-Differentiated	-	No
BF2139	167	M	KT;Ptf1aCreER;Trp53fl/LSL-R172H	Ascites	Adenocarcinoma	Yes	Moderately/Well-Differentiated	Poorly-Differentiated	No
BF1775	99	F	KT;Ptf1aCreER;Trp53fl/LSL-R270H	Hemorrhagic Ascites & Jaundice	Adenocarcinoma	Yes	Moderately/Well-Differentiated	-	No
BF1829	102	F	KT;Ptf1aCreER;Trp53fl/LSL-R270H	Jaundice	Adenocarcinoma	Yes	Moderately/Well-Differentiated	Poorly-Differentiated	No
BF1830	137	F	KT;Ptf1aCreER;Trp53fl/LSL-R270H	None Observed	Adenocarcinoma	Yes	Moderately/Well-Differentiated	Poorly-Differentiated	No
BF1906	97	F	KT;Ptf1aCreER;Trp53fl/LSL-R270H	None Observed	Adenocarcinoma	Not determined due to poor tissue preservation	Moderately/Well-Differentiated	Poorly-Differentiated	No
BF2180	102	F	KT;Ptf1aCreER;Trp53fl/LSL-R270H	Bowel Obstruction	Adenocarcinoma	Yes	Moderately/Well-Differentiated	Poorly-Differentiated	No
BF2248	99	F	KT;Ptf1aCreER;Trp53fl/LSL-R270H	Ascites & Bowel Obstruction	Adenocarcinoma	Yes	Moderately/Well-Differentiated	Poorly-Differentiated	No
BF2423	102	F	KT;Ptf1aCreER;Trp53fl/LSL-R270H	Hemorrhagic Ascites & Jaundice	Adenocarcinoma	Yes	Moderately/Well-Differentiated	Poorly-Differentiated	No
BF2673	172	F	KT;Ptf1aCreER;Trp53fl/LSL-R270H	Jaundice	Adenocarcinoma	Yes	Moderately/Well-Differentiated	-	No
BF2674	188	F	KT;Ptf1aCreER;Trp53fl/LSL-R270H	Bowel obstruction	Adenocarcinoma	Yes	Moderately/Well-Differentiated	Poorly-Differentiated	No
BF2677	181	F	KT;Ptf1aCreER;Trp53fl/LSL-R270H	Hemorrhagic Ascites & Jaundice	Adenocarcinoma	Yes	Moderately/Well-Differentiated	-	No
BF2759	204	F	KT;Ptf1aCreER;Trp53fl/LSL-R270H	Hemorrhagic Ascites & Jaundice	Adenocarcinoma	Yes	Poorly-Differentiated	Moderately/Well-Differentiated	No
BF2772	156	F	KT;Ptf1aCreER;Trp53fl/LSL-R270H	-	PanINs	-	-	-	-
BF2773	167	F	KT;Ptf1aCreER;Trp53fl/LSL-R270H	Bowel obstruction	Adenocarcinoma	Yes	Poorly-Differentiated	Moderately/Well-Differentiated	No
BF1831	102	M	KT;Ptf1aCreER;Trp53fl/LSL-R270H	Hemorrhagic Ascites	Adenocarcinoma	No	Poorly-Differentiated	Moderately/Well-Differentiated	No
BF1832	155	M	KT;Ptf1aCreER;Trp53fl/LSL-R270H	Bowel Obstruction	Adenocarcinoma	Not determined due to poor tissue preservation	Poorly-Differentiated	Moderately/Well-Differentiated	Yes
BF1846	286	M	KT;Ptf1aCreER;Trp53fl/LSL-R270H	Hemorrhagic Ascites & Jaundice	Adenocarcinoma	Yes	Moderately/Well-Differentiated	-	Yes
BF1889	123	M	KT;Ptf1aCreER;Trp53fl/LSL-R270H	Hemorrhagic Ascites	Adenocarcinoma	Yes	Moderately/Well-Differentiated	Poorly-Differentiated	No
BF1892	124	M	KT;Ptf1aCreER;Trp53fl/LSL-R270H	None Observed	Adenocarcinoma	Yes	Moderately/Well-Differentiated	Poorly-Differentiated	No
BF1907	103	M	KT;Ptf1aCreER;Trp53fl/LSL-R270H	None Observed	Adenocarcinoma	Yes	Moderately/Well-Differentiated	Poorly-Differentiated	-
BF1909	106	M	KT;Ptf1aCreER;Trp53fl/LSL-R270H	Ascites	Adenocarcinoma	Yes	Poorly-Differentiated	Moderately/Well-Differentiated	No
BF1985	144	M	KT;Ptf1aCreER;Trp53fl/LSL-R270H	Hemorrhagic Ascites & Bowel Obstruction	Adenocarcinoma	Yes	Moderately/Well-Differentiated	-	No
BF2175	119	M	KT;Ptf1aCreER;Trp53fl/LSL-R270H	None Observed	Adenocarcinoma	Yes	Poorly-Differentiated	Moderately/Well-Differentiated	Yes
BF2176	104	M	KT;Ptf1aCreER;Trp53fl/LSL-R270H	Hemorrhagic Ascites	Adenocarcinoma	Yes	Moderately/Well-Differentiated	-	No
BF2290	133	M	KT;Ptf1aCreER;Trp53fl/LSL-R270H	Hemorrhagic Ascites & Jaundice	Adenocarcinoma	Yes	Moderately/Well-Differentiated	Poorly-Differentiated	Yes
BF2351	170	M	KT;Ptf1aCreER;Trp53fl/LSL-R270H	None Observed	Adenocarcinoma	Yes	Poorly-Differentiated	Moderately/Well-Differentiated	Yes
BF2425	121	M	KT;Ptf1aCreER;Trp53fl/LSL-R270H	None Observed	Adenocarcinoma	Yes	Moderately/Well-Differentiated	-	No
BF2426	210	M	KT;Ptf1aCreER;Trp53fl/LSL-R270H	None Observed	Adenocarcinoma	Not determined due to poor tissue preservation	Moderately/Well-Differentiated	-	-
BF2427	109	M	KT;Ptf1aCreER;Trp53fl/LSL-R270H	None Observed	Adenocarcinoma	Not determined due to poor tissue preservation	Poorly-Differentiated	Moderately/Well-Differentiated	No
