# Supplementary material for: Cell of Origin Influences Pancreatic Cancer Subtype
Source: Oxford University Press journal article supplement (doi:10.1158/2159-8290.cd-20-0633), 2021-03-01
Supplement: 21598290cd200633-sup-242980_2_supp_6839450_qmy5kp.xlsx [file 21598290cd200633-sup-242980_2_supp_6839450_qmy5kp.xlsx]

## Sheet: Table S3
Table S3: Phenotypes in ductal cell-of-origin mouse cohorts
Mouse ID	Days post-tamoxifen	Sex	Genotype	Pancreatic cancer symptoms	Pancreas endpoint classification	Tumor-Adjacent PanINs	Primary Tumor Grade	Secondary Tumor Grade
BF634	462	F	KT;Sox9CreER;Trp53+/+	-	Normal pancreas	-	-	-
BF636	337	F	KT;Sox9CreER;Trp53+/+	-	Normal pancreas	-	-	-
BF766	639	F	KT;Sox9CreER;Trp53+/+	-	Normal pancreas	-	-	-
BF767	372	F	KT;Sox9CreER;Trp53+/+	-	Normal pancreas	-	-	-
BF1090	377	F	KT;Sox9CreER;Trp53+/+	-	Normal pancreas	-	-	-
BF1160	410	F	KT;Sox9CreER;Trp53+/+	-	Normal pancreas	-	-	-
BF1401	429	F	KT;Sox9CreER;Trp53+/+	-	Normal pancreas	-	-	-
BF1402	526	F	KT;Sox9CreER;Trp53+/+	-	Normal pancreas	-	-	-
BF1344	447	F	KT;Sox9CreER;Trp53+/+	-	Normal pancreas	-	-	-
BF550	312	M	KT;Sox9CreER;Trp53+/+	-	Normal pancreas	-	-	-
BF799	471	M	KT;Sox9CreER;Trp53+/+	-	Normal pancreas	-	-	-
BF769	420	M	KT;Sox9CreER;Trp53+/+	-	Normal pancreas	-	-	-
BF1101	501	M	KT;Sox9CreER;Trp53+/+	-	Normal pancreas	-	-	-
BF1231	282	M	KT;Sox9CreER;Trp53+/+	-	Normal pancreas	-	-	-
BF1761	326	M	KT;Sox9CreER;Trp53+/+	-	Normal pancreas	-	-	-
BF1764	348	M	KT;Sox9CreER;Trp53+/+	-	Normal pancreas	-	-	-
BF1857	414	M	KT;Sox9CreER;Trp53+/+	-	Normal pancreas	-	-	-
BF1993	372	M	KT;Sox9CreER;Trp53+/+	-	Normal pancreas	-	-	-
BF582	295	F	KT;Sox9CreER;Trp53fl/fl	-	Normal pancreas	-	-	-
BF583	296	F	KT;Sox9CreER;Trp53fl/fl	None Observed	Adenocarcinoma	No	Moderately/Well-Differentiated	-
BF613	215	F	KT;Sox9CreER;Trp53fl/fl	-	-	-	-	-
BF695	244	F	KT;Sox9CreER;Trp53fl/fl	-	Normal pancreas	-	-	-
BF683	187	F	KT;Sox9CreER;Trp53fl/fl	-	Normal pancreas	-	-	-
BF801	211	F	KT;Sox9CreER;Trp53fl/fl	-	Normal pancreas	-	-	-
BF773	195	F	KT;Sox9CreER;Trp53fl/fl	Hemorrhagic Ascites	Adenocarcinoma	No	Poorly-Differentiated	Moderately/Well-Differentiated
BF782	415	F	KT;Sox9CreER;Trp53fl/fl	None Observed	Adenocarcinoma	No	Poorly-Differentiated	Moderately/Well-Differentiated
BF816	270	F	KT;Sox9CreER;Trp53fl/fl	-	Normal pancreas	-	-	-
BF817	392	F	KT;Sox9CreER;Trp53fl/fl	-	Normal pancreas	-	-	-
BF863	300	F	KT;Sox9CreER;Trp53fl/fl	-	Normal pancreas	-	-	-
BF975	274	F	KT;Sox9CreER;Trp53fl/fl	-	Normal pancreas	-	-	-
CS736	124	F	KT;Sox9CreER;Trp53fl/fl	None Observed	Adenocarcinoma	No	Moderately/Well-Differentiated	Poorly-Differentiated
BF594	302	M	KT;Sox9CreER;Trp53fl/fl	-	Normal pancreas
BF654	215	M	KT;Sox9CreER;Trp53fl/fl	Hemorrhagic Ascites	Adenocarcinoma	No	Moderately/Well-Differentiated	Poorly-Differentiated
BF707	222	M	KT;Sox9CreER;Trp53fl/fl	None Observed	Adenocarcinoma	No	Moderately/Well-Differentiated	-
BF696	223	M	KT;Sox9CreER;Trp53fl/fl	Hemorrhagic Ascites	Adenocarcinoma	No	Poorly-Differentiated	Moderately/Well-Differentiated
BF798	355	M	KT;Sox9CreER;Trp53fl/fl	-	Normal pancreas	-	-	-
BF884	253	M	KT;Sox9CreER;Trp53fl/fl	-	Normal pancreas	-	-	-
BF968	240	M	KT;Sox9CreER;Trp53fl/fl	-	Normal pancreas	-	-	-
BF976	266	M	KT;Sox9CreER;Trp53fl/fl	-	Normal pancreas	-	-	-
BF977	300	M	KT;Sox9CreER;Trp53fl/fl	-	Normal pancreas	-	-	-
BF978	300	M	KT;Sox9CreER;Trp53fl/fl	-	Normal pancreas	-	-	-
BF1181	218	M	KT;Sox9CreER;Trp53fl/fl	Ascites & Bowel Obstruction	Adenocarcinoma	No	Poorly-Differentiated	Moderately/Well-Differentiated
BF1182	218	M	KT;Sox9CreER;Trp53fl/fl	Hemorrhagic Ascites	Adenocarcinoma	No	Moderately/Well-Differentiated	Poorly-Differentiated
BF1882	50	F	KT;Sox9CreER;Trp53fl/-	-	Normal pancreas	-	-	-
BF2002	397	F	KT;Sox9CreER;Trp53fl/-	-	Normal pancreas	-	-	-
BF2017	146	F	KT;Sox9CreER;Trp53fl/-	-	Normal pancreas	-	-	-
BF2085	244	F	KT;Sox9CreER;Trp53fl/-	-	Normal pancreas	-	-	-
BF2126	257	F	KT;Sox9CreER;Trp53fl/-	-	Normal pancreas	-	-	-
BF2295	229	F	KT;Sox9CreER;Trp53fl/-	-	Normal pancreas	-	-	-
BF2450	238	F	KT;Sox9CreER;Trp53fl/-	-	Normal pancreas	-	-	-
BF2502	182	F	KT;Sox9CreER;Trp53fl/-	-	Normal pancreas	-	-	-
BF2504	181	F	KT;Sox9CreER;Trp53fl/-	-	Normal pancreas	-	-	-
BF1708	263	M	KT;Sox9CreER;Trp53fl/-	None Observed	Adenocarcinoma	No	Moderately/Well-Differentiated	-
BF1709	217	M	KT;Sox9CreER;Trp53fl/-	Jaundice	Sarcomatoid carcinoma	No	Undifferentiated (Sarcomatoid)	Moderately/Well-Differentiated
BF1710	282	M	KT;Sox9CreER;Trp53fl/-	-	Normal pancreas	-	-
BF2004	298	M	KT;Sox9CreER;Trp53fl/-	-	-	-	-	-
BF2031	218	M	KT;Sox9CreER;Trp53fl/-	-	Normal pancreas	-	-	-
BF2338	187	M	KT;Sox9CreER;Trp53fl/-	-	Normal pancreas	-	-	-
BF2344	309	M	KT;Sox9CreER;Trp53fl/-	-	Normal pancreas	-	-	-
BF2446	201	M	KT;Sox9CreER;Trp53fl/-	-	-	-	-	-
BF2449	295	M	KT;Sox9CreER;Trp53fl/-	-	Normal pancreas	-	-	-
BF2455	290	M	KT;Sox9CreER;Trp53fl/-	Ascites	Adenocarcinoma	No	Poorly-Differentiated	Moderately/Well-Differentiated
BF758	260	F	KT;Sox9CreER;Trp53fl/LSL-R172H	-	Normal pancreas	-	-	-
BF1686	125	F	KT;Sox9CreER;Trp53fl/LSL-R172H	-	Normal pancreas	-	-	-
BF1687	323	F	KT;Sox9CreER;Trp53fl/LSL-R172H	-	Normal pancreas	-	-	-
BF1814	270	F	KT;Sox9CreER;Trp53fl/LSL-R172H	-	Normal pancreas	-	-	-
BF1818	308	F	KT;Sox9CreER;Trp53fl/LSL-R172H	-	Normal pancreas	-	-	-
BF2001	172	F	KT;Sox9CreER;Trp53fl/LSL-R172H	-	Normal pancreas	-	-	-
BF2458	268	F	KT;Sox9CreER;Trp53fl/LSL-R172H	-	Normal pancreas	-	-	-
BF2459	238	F	KT;Sox9CreER;Trp53fl/LSL-R172H	None Observed	Adenocarcinoma	No	Poorly-Differentiated	Moderately/Well-Differentiated
BF2461	157	F	KT;Sox9CreER;Trp53fl/LSL-R172H	-	Normal pancreas	-	-	-
BF2468	196	F	KT;Sox9CreER;Trp53fl/LSL-R172H	None Observed	Adenocarcinoma	No	Moderately/Well-Differentiated	-
BF825	129	M	KT;Sox9CreER;Trp53fl/LSL-R172H	None Observed	Adenocarcinoma	No	Moderately/Well-Differentiated	-
BF815	199	M	KT;Sox9CreER;Trp53fl/LSL-R172H	-	Normal pancreas	-	-	-
BF761	254	M	KT;Sox9CreER;Trp53fl/LSL-R172H	-	Normal pancreas	-	-	-
BF763	254	M	KT;Sox9CreER;Trp53fl/LSL-R172H	-	Normal pancreas	-	-	-
BF885	101	M	KT;Sox9CreER;Trp53fl/LSL-R172H	-	Normal pancreas	-	-	-
BF2020	220	M	KT;Sox9CreER;Trp53fl/LSL-R172H	Hemorrhagic Ascites	Adenocarcinoma	No	Moderately/Well-Differentiated	Poorly-Differentiated
BF2360	173	M	KT;Sox9CreER;Trp53fl/LSL-R172H	-	Normal pancreas	-	-	-
BF1869	324	F	KT;Sox9CreER;Trp53fl/LSL-R270H	-	Normal pancreas	-	-	-
BF2037	263	F	KT;Sox9CreER;Trp53fl/LSL-R270H	-	Normal pancreas	-	-	-
BF2192	259	F	KT;Sox9CreER;Trp53fl/LSL-R270H	-	-	-	-	-
BF2380	170	F	KT;Sox9CreER;Trp53fl/LSL-R270H	-	Normal pancreas	-	-	-
BF2381	211	F	KT;Sox9CreER;Trp53fl/LSL-R270H	-	Normal pancreas	-	-	-
BF2554	255	F	KT;Sox9CreER;Trp53fl/LSL-R270H	-	Normal pancreas	-	-	-
BF2557	161	F	KT;Sox9CreER;Trp53fl/LSL-R270H	-	Normal pancreas	-	-	-
BF2605	177	F	KT;Sox9CreER;Trp53fl/LSL-R270H	-	Normal pancreas	-	-	-
BF2647	146	F	KT;Sox9CreER;Trp53fl/LSL-R270H	None Observed	Adenocarcinoma	No	Poorly-Differentiated	Moderately/Well-Differentiated
BF2650	208	F	KT;Sox9CreER;Trp53fl/LSL-R270H	-	-	-	-	-
BF2168	215	M	KT;Sox9CreER;Trp53fl/LSL-R270H	Hemorrhagic Ascites	Adenocarcinoma	No	Poorly-Differentiated	Moderately/Well-Differentiated
BF2302	201	M	KT;Sox9CreER;Trp53fl/LSL-R270H	-	Normal pancreas	-	-	-
BF2439	77	M	KT;Sox9CreER;Trp53fl/LSL-R270H	-	Normal pancreas	-	-	-
BF2591	145	M	KT;Sox9CreER;Trp53fl/LSL-R270H	-	Normal pancreas	-	-	-
BF2593	187	M	KT;Sox9CreER;Trp53fl/LSL-R270H	-	Normal pancreas	-	-	-
BF2596	169	M	KT;Sox9CreER;Trp53fl/LSL-R270H	None Observed	Adenocarcinoma	No	Moderately/Well-Differentiated	Poorly-Differentiated
BF2609	182	M	KT;Sox9CreER;Trp53fl/LSL-R270H	-	-	-	-	-
BF2611	182	M	KT;Sox9CreER;Trp53fl/LSL-R270H	-	-	-	-	-
